# Supplementary material for: Suppression of proteolipid protein rescues Pelizaeus–Merzbacher disease
Source: Springer Nature journal article supplement (doi:10.1038/s41586-020-2494-3), 2020-07-01
Supplement: 41586_2020_2494_MOESM1_ESM.pdf [file 41586_2020_2494_MOESM1_ESM.pdf]

---

**Supplementary information**

---

**Suppression of proteolipid protein rescues  
Pelizaeus–Merzbacher disease**

---

In the format provided by the  
authors and unedited

**SUPPLEMENTARY TABLE 1**

| <b>PLP1 mutation</b>                                                                                     | <b>Patient #</b> | <b>Motor function</b>                                                                              | <b>Cognitive function</b>                                                                                                      | <b>Death</b>  | <b>Ref.</b>    |
|----------------------------------------------------------------------------------------------------------|------------------|----------------------------------------------------------------------------------------------------|--------------------------------------------------------------------------------------------------------------------------------|---------------|----------------|
| Frameshift and early termination codon (c.4delG)<br><br><i>Protein absence confirmed by western blot</i> | 1                | Wheelchair bound at 35 with spasticity in all limbs                                                | No intellectual disability and verbally communicated into mid-20s. Cooperative, alert, and aware of surroundings in adulthood. | Age 47        | <sup>1,2</sup> |
|                                                                                                          | 2                | Wheelchair bound at 37 with spasticity in all limbs                                                | No intellectual disability and verbally communicated into mid-20s. Cooperative, alert, and aware of surroundings in adulthood. | Age 49        |                |
|                                                                                                          | 3                | Walked from age 4-12, spasticity in all limbs at age 25                                            | Language delay. At 22 communicated, was cooperative, and alert. At 25 could follow commands, count, and distinguish colors.    | Age 34        |                |
|                                                                                                          | 4                | Wheelchair bound at 17, gait deterioration starting at age 8, and spasticity in legs but not arms. | Able to read, follow commands, and perform arithmetic.                                                                         | None reported |                |
| Frameshift and early termination codon c.191+1G>A<br><br><i>No biochemical analysis</i>                  | 1                | Walked from age 6-9. Spastic with cerebellar dysfunction.                                          | Attends normal school and can read and write.                                                                                  | None reported | <sup>3</sup>   |
| Loss of start codon (c.3G>A)<br><br><i>No biochemical analysis</i>                                       | 1                | Early life motor dysfunction with spasticity in arms and legs. Further decline at age 33.          | Early life intellectual disability. Further decline at age 33.                                                                 | None reported | <sup>2,4</sup> |
|                                                                                                          | 2                | Early life hypertonia and spasticity in arms and legs. Wheelchair bound at 6.                      | Language delay. Moderately retarded development.                                                                               | None reported |                |
|                                                                                                          | 3                | Never walked and spasticity in legs by age 1, progressing to arms with age.                        | Mild cognitive deficits at age 20.                                                                                             | None reported | <sup>5</sup>   |

**Table S1.**

Table containing details of published reports of *PLP1*-null patients.

## SUPPLEMENTARY TABLE 2

| Mouse | Genotype     | <i>Plp1</i> exon 3 indels                  |
|-------|--------------|--------------------------------------------|
| 1     | Wild-type    | 81bp deletion (29%)<br>2bp insertion (71%) |
| 2     | Wild-type    | 86bp deletion (61%)<br>1bp insertion (39%) |
| 3     | Wild-type    | 1bp insertion (100%)                       |
| 4     | <i>jimpy</i> | 80bp deletion (100%)                       |
| 5     | Wild-type    | 83bp deletion (100%)                       |
| 6     | Wild-type    | 1bp deletion (100%)                        |
| 7     | Wild-type    | 1bp insertion (26%)                        |

### Table S2.

Table showing the on-target mutations for sgRNAs 3 and 7 after electroporation into mouse zygotes and measured by high-throughput sequencing of tail tip DNA from founder animals. Mouse number 4, a *jimpy* male with a complex deletion including 80-bp of total deleted sequence in *Plp1* exon 3, served as the founder for the CR-*impy* cohort.

### SUPPLEMENTARY TABLE 3

|                                 |                                                                       |
|---------------------------------|-----------------------------------------------------------------------|
| <b>Protein Group</b>            | 982                                                                   |
| <b>Protein ID</b>               | 700                                                                   |
| <b>Accession</b>                | P60202 MYPR_MOUSE                                                     |
| <b>Coverage (%)</b>             | 7                                                                     |
| <b>#Peptides</b>                | 2                                                                     |
| <b>PTM</b>                      | Carbamidomethylation                                                  |
| <b>WT Intensity</b>             | 7.75E+08                                                              |
| <b><i>jimpy</i> Intensity</b>   | 6.27E+06                                                              |
| <b>CR-<i>impy</i> Intensity</b> | 0                                                                     |
| <b>Avg. Mass</b>                | 30077                                                                 |
| <b>Description</b>              | Myelin proteolipid protein OS=Mus musculus OX=10090 GN=Plp1 PE=1 SV=2 |

#### Table S3.

Table showing quantification of PLP signal intensities from LC-MS/MS analysis of wild type (WT), *jimpy*, and CR-*impy* samples. PLP protein were decreased over 100-fold in *jimpy* compared to wild-type and undetectable in CR-*impy*.

## SUPPLEMENTARY TABLE 4

| Sequencing primers       |                               |                          |                                  |
|--------------------------|-------------------------------|--------------------------|----------------------------------|
| PCR amplicon             | Genomic Location              | Forward Primer           | Reverse Primer                   |
| <i>jimpy</i> mutation    | <i>Plp1</i> intron 4 - exon 5 | AACGCAAAGCAGCACATTTCA    | AGTGCAGCTCTGGGGTTAAT             |
| CR- <i>impy</i> mutation | <i>Plp1</i> exon 3            | TCTGTCTGTCCATGCAGGATT    | GACACACCCGCTCCAAGAA              |
| qPCR primers             |                               |                          |                                  |
| Gene                     | Forward primer                | Reverse primer           | Probe (5'FAM; 3'TAMRA)           |
| <i>Plp1</i>              | CTGATGCCAGAATGTATGGTGT        | AGGTGGAAGGTCATTTGGAAC    | TGCAGATGGACAGAAGGTTGGAGC         |
| <i>Gfap</i>              | GAAACCAGCCTGGACACCAA          | TCCACAGTCTTTACCACGATGTTT | TCCGTGTGAGAAGGCCACCTCAAGA        |
| <i>Aif1</i>              | TGGTCCCCCAGCCAAGA             | CCCACCGTGTGACATCCA       | AGCTATCTCCGAGCTGCCCTGATTGG       |
| <i>Cd68</i>              | TGGCGGTGGAATACAATGTG          | GATGAATTCTGCGCCATGAA     | CCTCCACAGGCAGCACAGTGG            |
| Gene                     | Forward primer                | Reverse primer           | Probe (5'FAM; 3'IBFQ)            |
| <i>Xylt1</i>             | AAGTCTTCAAGGTCGCAAGTC         | CAAAAGACCACCAAAGTTCCG    | CCCAGTCAG/ZEN/TGCCAACCTAGAA      |
| <i>Scfd1</i>             | CGGAGTAATGACAGCTCAGTT         | CCTTGCTTTGCCTTTATGTAGTC  | AAGACAATG/ZEN/GCCTCTTGGAAATGGACT |
| <i>Tpk1</i>              | CAAGCCACTCACATCACTCC          | CACCAGCTCCCTTCCATTC      | TCTCTCATC/ZEN/TACCTCCTCCAACCCG   |

**Table S4.**  
Table listing all PCR primers.

# SUPPLEMENTARY DATA 1

| Metadata for mouse CRISPR survival cohort from Elitt et al. |               |               |                    |                 |           |           |                |                          |         | mean time to fall (seconds) |       |       |            | total distance traveled (meters) |      |       |  |
|-------------------------------------------------------------|---------------|---------------|--------------------|-----------------|-----------|-----------|----------------|--------------------------|---------|-----------------------------|-------|-------|------------|----------------------------------|------|-------|--|
| Identifier                                                  | Date of birth | Date of death | Euthanized at      |                 | Genotype  | Phenotype | Censored (Y/N) | Censor Reason            | Rotarod |                             |       |       | Open field |                                  |      |       |  |
|                                                             |               |               | 18 month endpoint? | Lifespan (days) |           |           |                |                          | 3 wk    | 2 mo                        | 6 mo  | 18 mo | 3 wk       | 2 mo                             | 6 mo | 18 mo |  |
| CR200301                                                    | 11/13/2016    | 4/22/2018     | n                  | 525             | wild-type | none      | N              |                          | 69.3    | 70.9                        | 61.8  |       | 22.8       | 17.9                             | 12.5 |       |  |
| CR200090                                                    | 11/13/2016    | 5/14/2018     | y                  | 547             | wild-type | none      | N              |                          | 144.0   | 104.1                       | 60.1  | 43.0  | 17.0       | 17.4                             | 10.8 | 13.2  |  |
| CR200091                                                    | 11/13/2016    | 5/14/2018     | y                  | 547             | wild-type | none      | N              |                          | 81.3    | 103.4                       | 77.5  | 61.3  | 19.3       | 18.8                             | 10.2 | 15.4  |  |
| CR200302                                                    | 11/15/2016    | 12/5/2017     | n                  | 385             | CR-impv   | none      | N              |                          | 100.7   | 120.9                       | 108.0 |       | 10.9       | 15.0                             | 15.5 |       |  |
| CR200303                                                    | 11/15/2016    | 12/28/2017    | n                  | 408             | CR-impv   | none      | N              |                          | 115.3   | 138.0                       | 74.2  |       | 8.6        | 14.3                             | 17.7 |       |  |
| CR200304                                                    | 11/15/2016    | 5/6/2018      | n                  | 537             | CR-impv   | none      | N              |                          | 95.7    | 138.3                       | 55.2  |       | 13.7       | 11.0                             | 11.5 |       |  |
| CR200092                                                    | 11/15/2016    | 5/14/2018     | y                  | 545             | CR-impv   | none      | N              |                          | 139.4   | 106.3                       | 66.2  | 16.3  | 10.1       | 10.2                             | 10.5 | 7.3   |  |
| CR200093                                                    | 11/15/2016    | 5/14/2018     | y                  | 545             | CR-impv   | none      | N              |                          | 72.7    | 117.7                       | 116.3 | 29.2  | 17.1       | 7.9                              | 17.3 | 22.0  |  |
| CR200305                                                    | 11/15/2016    | 12/8/2016     | n                  | 23              | impv      | severe    | N              |                          | 39.1    |                             |       |       | 3.9        |                                  |      |       |  |
| CR200306                                                    | 11/15/2016    | 12/7/2016     | n                  | 22              | impv      | severe    | N              |                          | 21.0    |                             |       |       | 2.4        |                                  |      |       |  |
| CR200307                                                    | 11/15/2016    | 12/9/2016     | n                  | 24              | impv      | severe    | N              |                          | 20.7    |                             |       |       | 1.0        |                                  |      |       |  |
| CR200308                                                    | 11/15/2016    | 12/5/2016     | n                  | 20              | impv      | severe    | N              |                          | 12.9    |                             |       |       | 5.5        |                                  |      |       |  |
| CR200309                                                    | 11/15/2016    | 12/6/2016     | n                  | 21              | impv      | severe    | N              |                          | 4.7     |                             |       |       | 6.8        |                                  |      |       |  |
| CR200310                                                    | 11/16/2016    | 12/17/2016    | n                  | 31              | impv      | severe    | N              |                          | 38.7    |                             |       |       | 0.4        |                                  |      |       |  |
| CR200311                                                    | 11/16/2016    | 12/10/2016    | n                  | 24              | impv      | severe    | N              |                          | 31.9    |                             |       |       | 0.6        |                                  |      |       |  |
| CR200312                                                    | 11/17/2016    | 4/30/2018     | n                  | 529             | wild-type | none      | N              |                          | 101.6   | 84.7                        | 52.9  |       | 19.0       | 7.0                              | 8.1  |       |  |
| CR200096                                                    | 11/17/2016    | 5/14/2018     | y                  | 543             | wild-type | none      | N              |                          | 93.0    | 219.3                       | 125.7 | 29.1  | 20.0       | 25.7                             | 12.7 | 12.5  |  |
| CR200313                                                    | 11/17/2016    | 3/27/2018     | n                  | 495             | wild-type | none      | N              |                          | 156.7   | 70.4                        | 52.6  |       | 14.4       | 17.0                             | 9.3  |       |  |
| CR200097                                                    | 11/17/2016    | 5/14/2018     | y                  | 543             | wild-type | none      | N              |                          | 55.9    | 86.0                        | 118.8 | 71.9  | 15.6       | 18.0                             | 25.1 | 14.1  |  |
| CR200094                                                    | 11/18/2016    | 5/14/2018     | y                  | 542             | CR-impv   | none      | N              |                          | 65.8    | 74.0                        | 111.1 | 16.3  | 22.5       | 15.8                             | 16.2 | 7.2   |  |
| CR200314                                                    | 11/18/2016    | 3/19/2018     | n                  | 486             | CR-impv   | none      | N              |                          | 69.6    | 71.3                        | 90.9  |       | 21.1       | 17.0                             | 15.5 |       |  |
| CR200095                                                    | 11/18/2016    | 5/14/2018     | y                  | 542             | CR-impv   | none      | N              |                          | 110.1   | 128.3                       | 148.1 | 29.2  | 19.1       | 26.4                             | 19.6 | 27.6  |  |
| CR200315                                                    | 11/26/2016    | 12/22/2016    | n                  | 26              | impv      | severe    | N              |                          | 2.7     |                             |       |       | 1.8        |                                  |      |       |  |
| CR200316                                                    | 11/26/2016    | 12/18/2016    | n                  | 22              | impv      | severe    | N              |                          | 27.3    |                             |       |       | 0.5        |                                  |      |       |  |
| CR200317                                                    | 11/26/2016    | 12/18/2016    | n                  | 22              | impv      | severe    | N              |                          | 24.2    |                             |       |       | 0.9        |                                  |      |       |  |
| CR200318                                                    | 11/26/2016    | 12/20/2016    | n                  | 24              | impv      | severe    | N              |                          | 26.9    |                             |       |       | 1.2        |                                  |      |       |  |
| CR200319                                                    | 11/26/2016    | 12/19/2016    | n                  | 23              | impv      | severe    | N              |                          | 41.4    |                             |       |       | 1.0        |                                  |      |       |  |
| CR200320                                                    | 12/12/2016    | 1/5/2017      | n                  | 24              | impv      | severe    | N              |                          |         |                             |       |       |            |                                  |      |       |  |
| CR200321                                                    | 12/12/2016    | 12/31/2016    | n                  | 19              | impv      | severe    | N              |                          |         |                             |       |       |            |                                  |      |       |  |
| CR200322                                                    | 12/12/2016    | 11/16/2017    | n                  | 339             | CR-impv   | none      | N              |                          |         | 102.9                       | 88.2  |       |            | 25.2                             | 26.0 |       |  |
| CR200323                                                    | 12/12/2016    | 6/27/2018     | y                  | 562             | CR-impv   | none      | N              |                          |         | 81.1                        | 89.4  | 43.9  |            | 15.4                             | 17.8 | 19.6  |  |
| CR200324                                                    | 3/30/2017     | 4/20/2017     | n                  | 21              | impv      | severe    | N              |                          |         |                             |       |       |            |                                  |      |       |  |
| CR200325                                                    | 3/30/2017     | 4/20/2017     | n                  | 21              | impv      | severe    | N              |                          |         |                             |       |       |            |                                  |      |       |  |
| CR200326                                                    | 3/30/2017     | 4/26/2017     | n                  | 27              | impv      | severe    | N              |                          |         |                             |       |       |            |                                  |      |       |  |
| CR200327                                                    | 3/30/2017     | 4/24/2017     | n                  | 25              | impv      | severe    | N              |                          |         |                             |       |       |            |                                  |      |       |  |
| CR200328                                                    | 11/13/2016    | 10/1/2017     | n                  | 322             | wild-type | none      | Y              | Euthanized inadvertently | 92.7    | 135.4                       | 63.5  |       | 31.8       | 18.3                             | 8.9  |       |  |
| CR200329                                                    | 11/13/2016    | 10/1/2017     | n                  | 322             | wild-type | none      | Y              | Euthanized inadvertently | 148.7   | 126.7                       | 102.4 |       | 18.6       | 13.8                             | 6.7  |       |  |
| CR200330                                                    | 11/13/2016    | 10/1/2017     | n                  | 322             | wild-type | none      | Y              | Euthanized inadvertently | 85.7    | 109.3                       | 120.0 |       | 15.3       | 19.4                             | 19.1 |       |  |
| CR200081                                                    | 11/15/2016    | 6/1/2017      | n                  | 198             | wild-type | none      | Y              | Tissue collection        | 196.0   | 160.7                       | 145.0 |       | 13.5       | 20.9                             | 10.3 |       |  |
| CR200082                                                    | 11/15/2016    | 6/1/2017      | n                  | 198             | CR-impv   | none      | Y              | Tissue collection        | 132.3   | 91.5                        | 99.1  |       | 13.5       | 15.1                             | 20.3 |       |  |
| CR200083                                                    | 11/15/2016    | 6/2/2017      | n                  | 199             | CR-impv   | none      | Y              | Tissue collection        | 120.5   | 93.6                        | 96.9  |       | 21.5       | 23.7                             | 25.2 |       |  |
| CR200084                                                    | 11/15/2016    | 6/2/2017      | n                  | 199             | wild-type | none      | Y              | Tissue collection        | 170.4   | 137.7                       | 78.6  |       | 23.7       | 11.5                             | 7.3  |       |  |
| CR200061                                                    | 11/15/2016    | 5/25/2017     | n                  | 191             | CR-impv   | none      | Y              | Tissue collection        | 102.5   | 111.7                       | 105.4 |       | 21.1       | 12.2                             | 16.2 |       |  |
| CR200062                                                    | 11/15/2016    | 5/25/2017     | n                  | 191             | CR-impv   | none      | Y              | Tissue collection        | 56.4    | 122.4                       | 63.4  |       | 13.3       | 15.1                             | 18.3 |       |  |
| CR200063                                                    | 11/15/2016    | 5/25/2017     | n                  | 191             | wild-type | none      | Y              | Tissue collection        | 109.3   | 115.3                       | 57.3  |       | 26.3       | 26.3                             | 10.8 |       |  |
| CR200064                                                    | 11/15/2016    | 5/25/2017     | n                  | 191             | wild-type | none      | Y              | Tissue collection        | 88.7    | 101.3                       | 82.0  |       | 17.4       | 15.6                             | 8.0  |       |  |
| CR200065                                                    | 11/16/2016    | 5/30/2017     | n                  | 195             | CR-impv   | none      | Y              | Tissue collection        | 42.5    | 100.8                       | 131.3 |       | 10.0       | 6.4                              | 6.7  |       |  |
| CR200075                                                    | 11/17/2016    | 5/31/2017     | n                  | 195             | wild-type | none      | Y              | Tissue collection        | 82.1    | 32.1                        | 23.3  |       | 24.0       | 21.3                             | 21.1 |       |  |
| CR200076                                                    | 11/17/2016    | 5/31/2017     | n                  | 195             | wild-type | none      | Y              | Tissue collection        | 162.8   | 70.8                        | 98.9  |       | 20.5       | 11.6                             | 9.4  |       |  |
| CR200077                                                    | 11/17/2016    | 5/31/2017     | n                  | 195             | wild-type | none      | Y              | Tissue collection        | 120.6   | 95.5                        | 108.5 |       | 20.5       | 26.0                             | 14.1 |       |  |
| CR200078                                                    | 11/18/2016    | 6/13/2017     | n                  | 207             | CR-impv   | none      | Y              | Tissue collection        | 40.5    | 102.0                       | 97.6  |       | 19.7       | 13.0                             | 7.8  |       |  |
| CR200079                                                    | 11/18/2016    | 6/13/2017     | n                  | 207             | wild-type | none      | Y              | Tissue collection        | 82.2    | 130.0                       | 77.2  |       | 12.8       | 15.6                             | 3.8  |       |  |
| CR200080                                                    | 11/18/2016    | 6/12/2017     | n                  | 206             | CR-impv   | none      | Y              | Tissue collection        | 87.0    | 78.1                        | 63.5  |       | 26.3       | 18.6                             | 15.8 |       |  |
| CR200085                                                    | 11/18/2016    | 6/12/2017     | n                  | 206             | wild-type | none      | Y              | Tissue collection        | 75.8    | 113.4                       | 104.0 |       | 19.7       | 9.3                              | 8.3  |       |  |
| CR200071                                                    | 11/18/2016    | 6/12/2017     | n                  | 206             | CR-impv   | none      | Y              | Tissue collection        | 59.0    | 142.3                       | 134.3 |       | 8.0        | 16.5                             | 8.3  |       |  |
| CR200086                                                    | 11/18/2016    | 6/13/2017     | n                  | 207             | wild-type | none      | Y              | Tissue collection        | 79.7    | 112.2                       | 100.1 |       | 14.3       | 8.512                            | 12.0 |       |  |
| CR200098                                                    | 11/18/2016    | 6/13/2017     | n                  | 207             | wild-type | none      | Y              | Tissue collection        | 90.6    | 130.3                       | 115.3 |       | 17.9       | 19.54                            | 13.0 |       |  |
| CR200066                                                    | 11/19/2016    | 5/30/2017     | n                  | 192             | CR-impv   | none      | Y              | Tissue collection        | 88.4    | 124.4                       | 82.9  |       | 14.0       | 14.136                           | 0.6  |       |  |
| CR200067                                                    | 11/19/2016    | 5/30/2017     | n                  | 192             | CR-impv   | none      | Y              | Tissue collection        | 131.7   | 146.0                       | 68.2  |       | 11.6       | 13.449                           | 9.8  |       |  |
| CR200068                                                    | 11/19/2016    | 5/30/2017     | n                  | 192             | wild-type | none      | Y              | Tissue collection        | 82.5    | 119.3                       | 126.1 |       | 14.1       | 20.689                           | 14.5 |       |  |
| CR200069                                                    | 11/22/2016    | 5/30/2017     | n                  | 189             | wild-type | none      | Y              | Tissue collection        | 88.4    | 67.0                        | 41.5  |       | 19.0       | 9.404                            | 8.4  |       |  |
| CR200070                                                    | 11/22/2016    | 5/30/2017     | n                  | 189             | wild-type | none      | Y              | Tissue collection        | 88.3    | 80.6                        | 77.4  |       | 20.1       | 9.051                            | 5.2  |       |  |
| CR200072                                                    | 11/22/2016    | 6/1/2017      | n                  | 191             | wild-type | none      | Y              | Tissue collection        | 110.7   | 170.0                       | 124.3 |       | 21.7       | 19.759                           | 11.8 |       |  |
| CR200073                                                    | 11/22/2016    | 6/1/2017      | n                  | 191             | wild-type | none      | Y              | Tissue collection        | 145.0   | 152.3                       | 116.1 |       | 13.5       | 22.028                           | 11.4 |       |  |
| CR200331                                                    | 11/26/2016    | 5/23/2017     | n                  | 178             | CR-impv   | none      | Y              | Euthanized inadvertently | 110.0   | 196.0                       |       |       | 24.3       | 16.452                           |      |       |  |
| CR200074                                                    | 12/12/2016    | 6/1/2017      | n                  | 171             | CR-impv   | none      | Y              | Tissue collection        |         | 94.2                        |       |       |            | 23.557                           |      |       |  |

## Supplementary Data 1.

Metadata for all mice in Kaplan-Meier survival plot in Fig. 1b. Also included are raw data values for rotarod and open field assays in Fig. 1k-l.

## SUPPLEMENTARY DATA 2

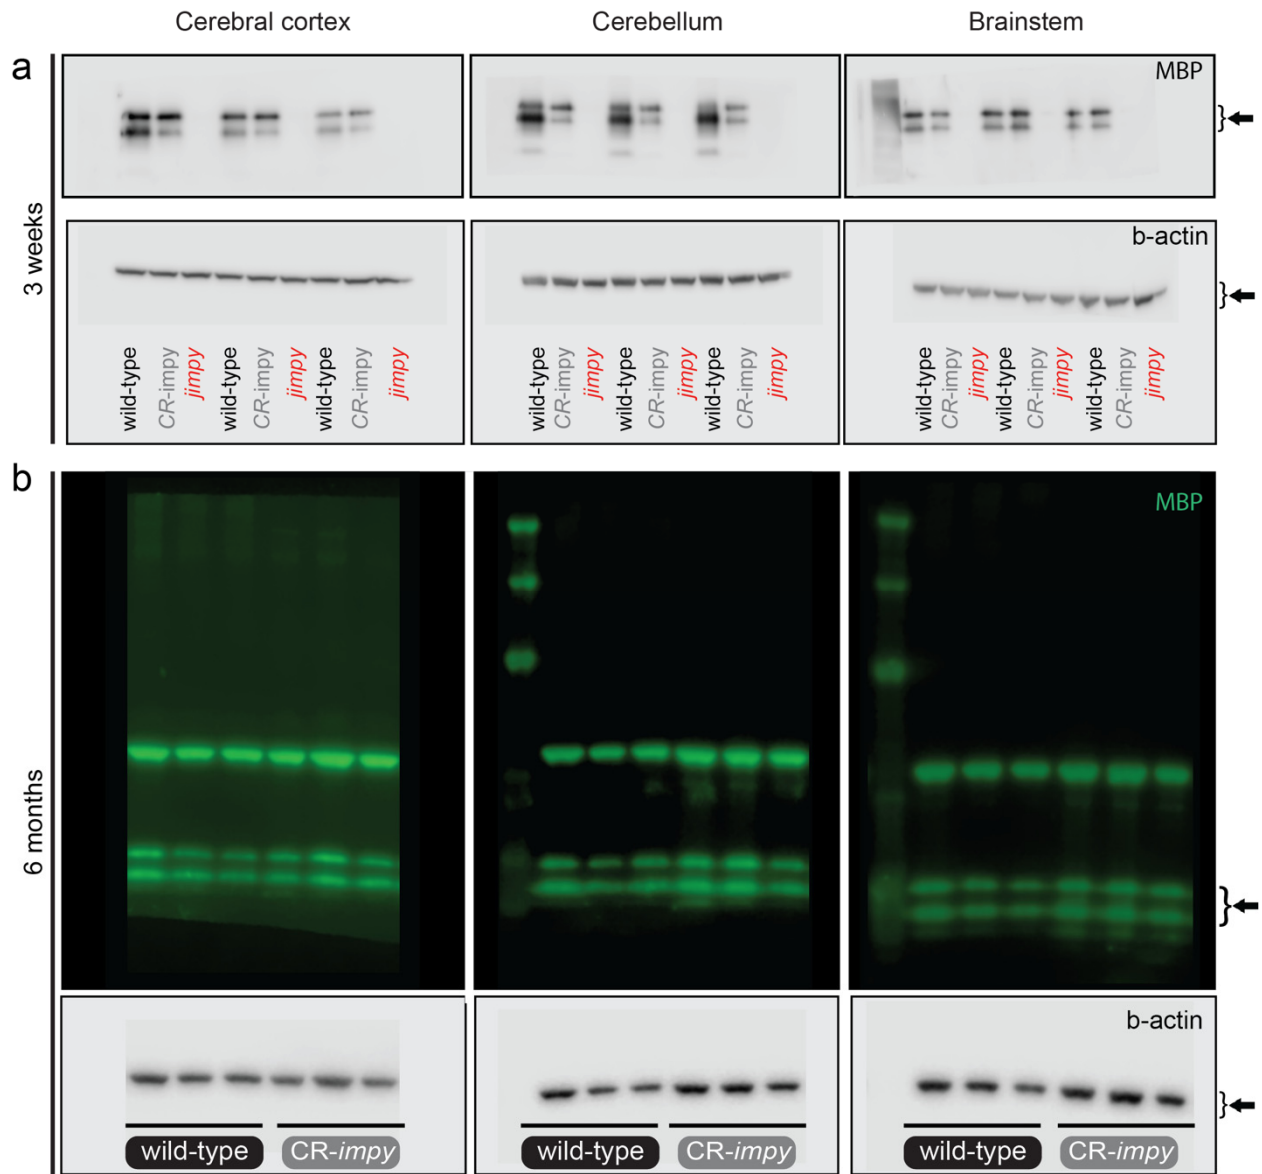

### Supplementary Data 2.

**a-b**, Labeled raw images of western blots for all samples in Extended Data Fig. 2, b, d. The upper bands in the fluorescent blots in (b) are carry over from chemiluminescent detection of B-actin (bottom panel).

### SUPPLEMENTARY DATA 3

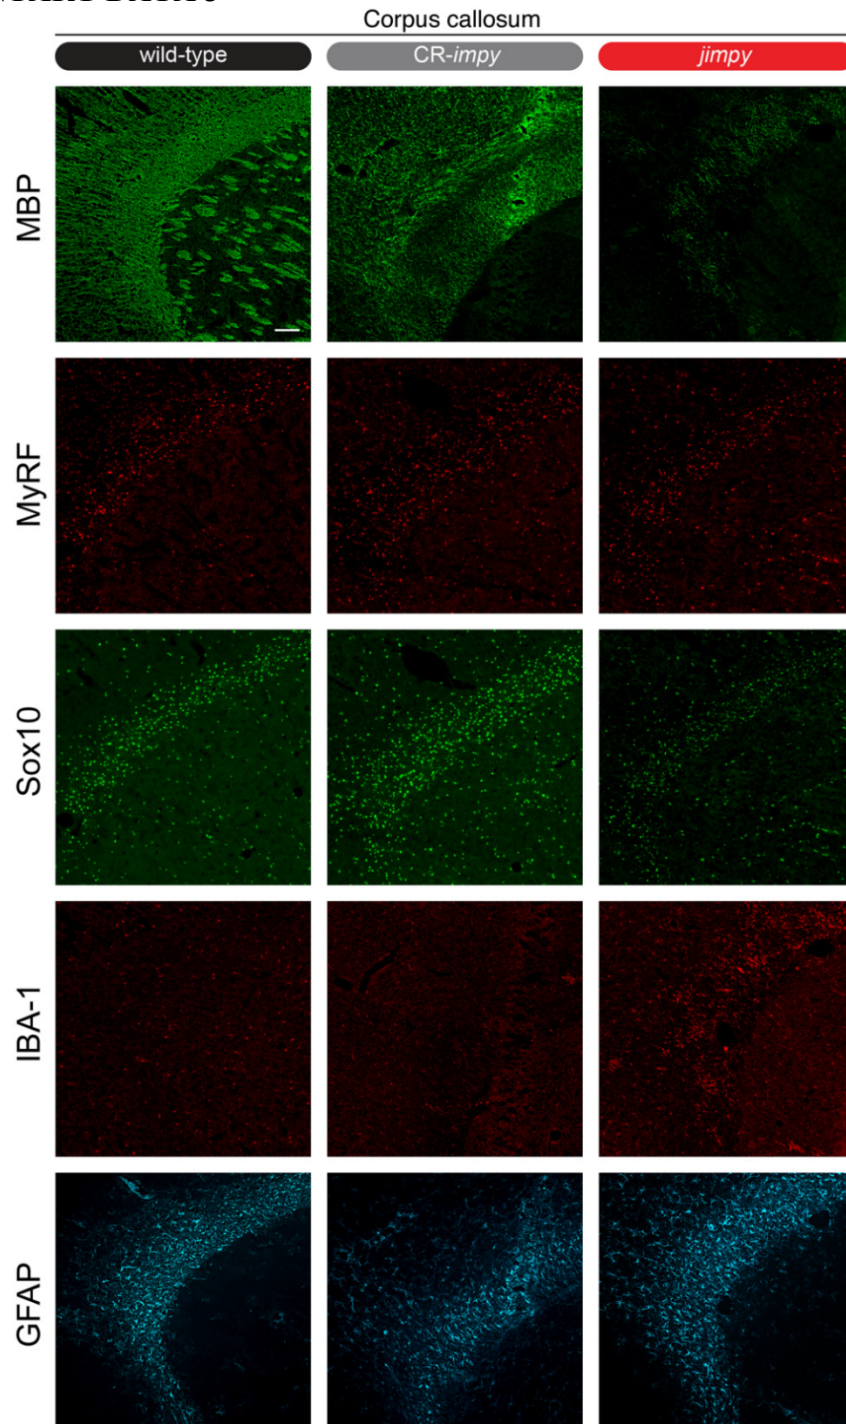

#### Supplementary Data 3.

Representative source immunohistochemical images for counts in Fig. 1d and Extended Data Fig. 3c,d of corpus callosum from 3-week old wild-type, CR-*impy*, and *jimpy* mice showing MBP, MyRF, and Sox10, IBA-1, or GFAP. Replicate images generated for each biological replicate in Fig. 1d and Extended Data Fig. 3c,d. Scale bar, 100 $\mu$ m.



## SUPPLEMENTARY DATA 4

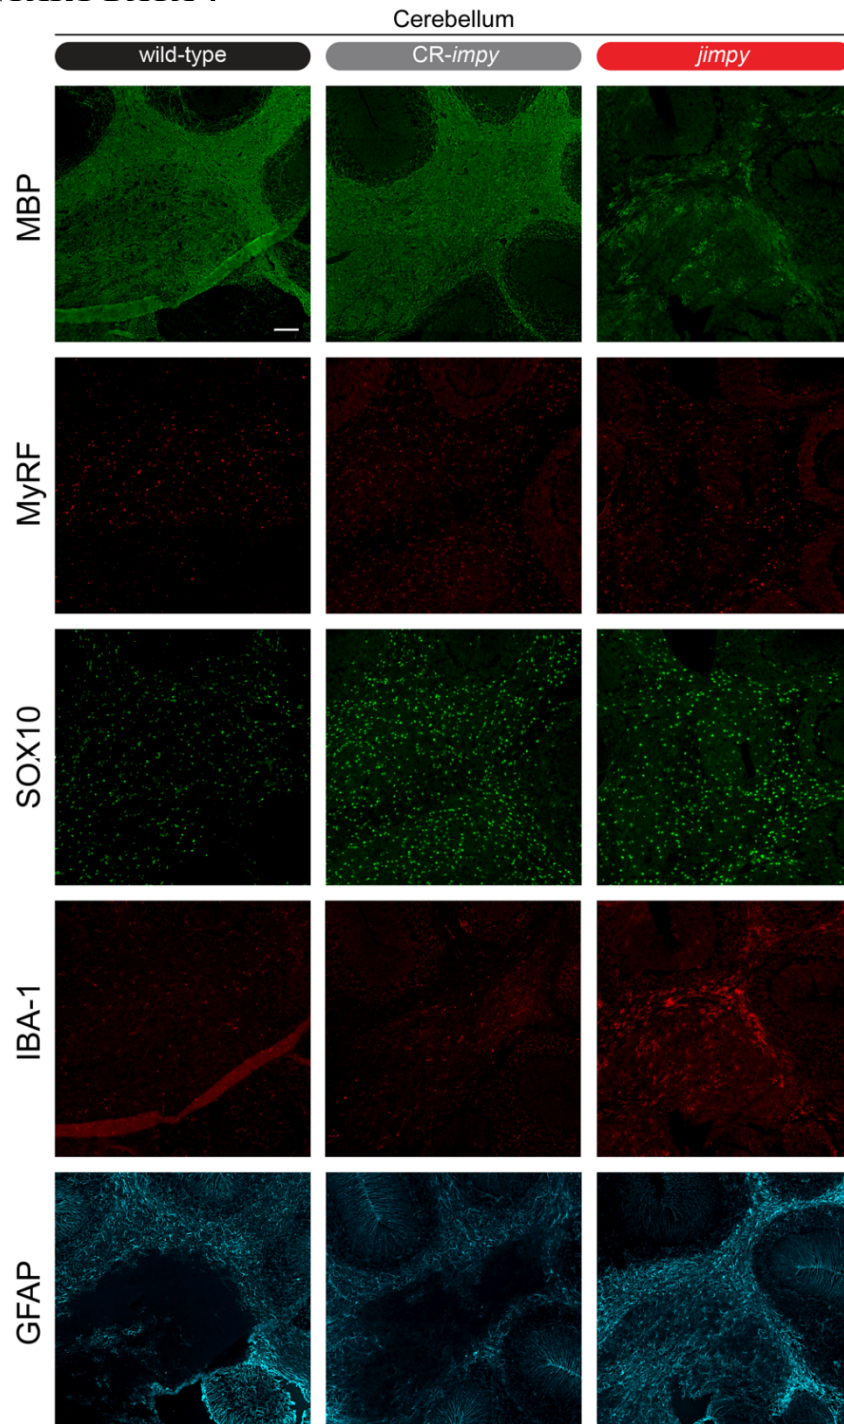

### Supplementary Data 4.

Representative source immunohistochemical images for counts in Fig. 1d,e and Extended Data Fig. 3c,d of cerebellum from 3-week old wild-type, CR-*impy*, and *jimpy* mice showing MBP, MyRF, and Sox10, IBA-1, or GFAP. Replicate images generated for each biological replicate in Fig. 1d and Extended Data Fig. 3c,d. Scale bar, 100 $\mu$ m.

## SUPPLEMENTARY DATA 5

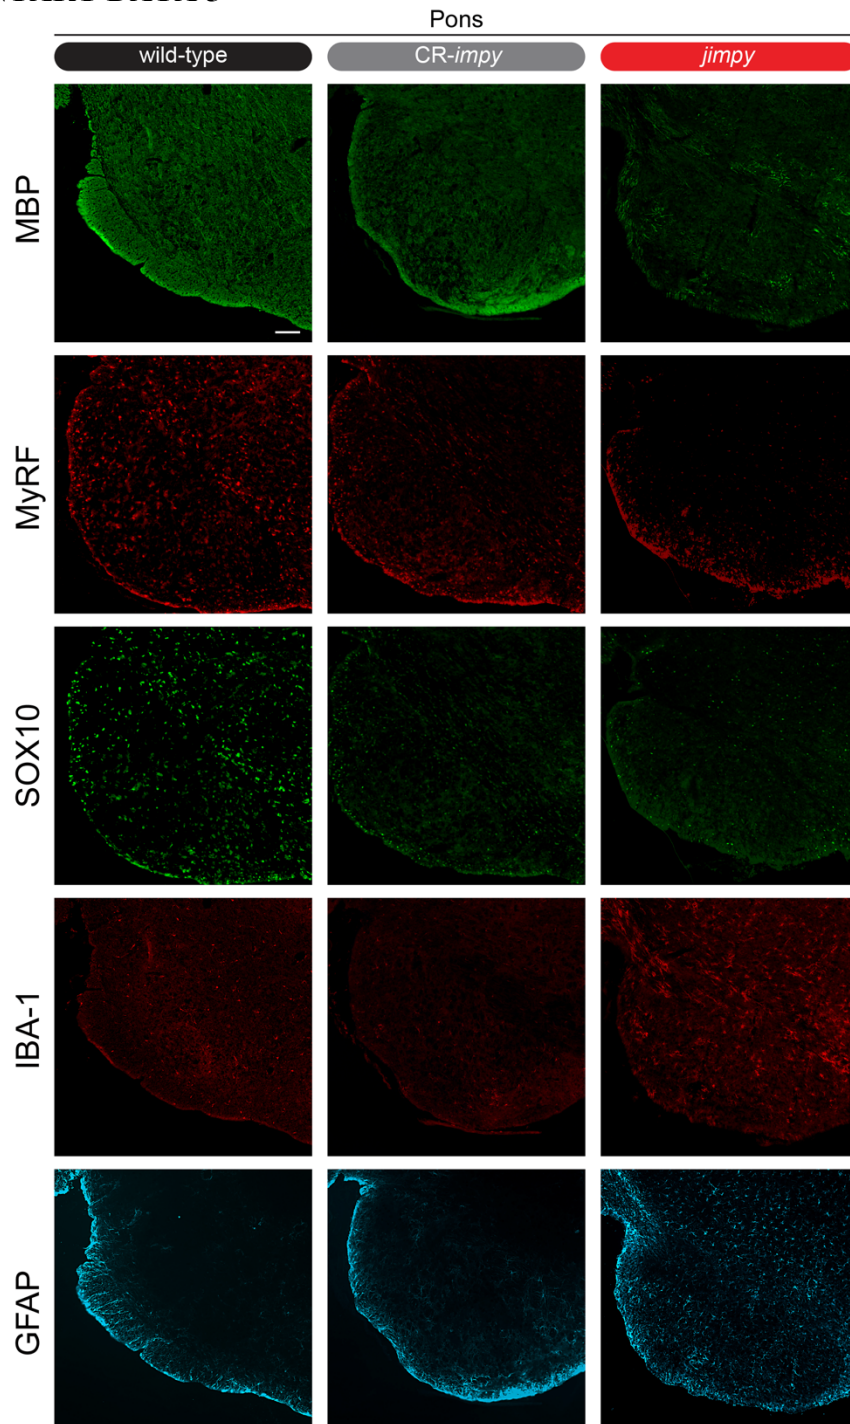

### Supplementary Data 5.

Representative source immunohistochemical images for counts in Fig. 1d,e and Extended Data Fig. 3c,d of pons from 3-week old wild-type, CR-*impy*, and *jimpy* mice showing MBP, MyRF, and Sox10, IBA-1, or GFAP. Replicate images generated for each biological replicate in Fig. 1d and Extended Data Fig. 3c,d. Scale bar, 100 $\mu$ m.

## SUPPLEMENTARY DATA 6

Metadata for mouse ASO survival cohort from Elitt et al.

| Identifier | Date of birth | Date of death | Euthanized at 8 month endpoint? | Lifespan (days) | Genotype     | Treatment   | Phenotype | Additional phenotype notes                             | mean time to fall (seconds) |                 |                 | total distance traveled (meters) |                 |                 |
|------------|---------------|---------------|---------------------------------|-----------------|--------------|-------------|-----------|--------------------------------------------------------|-----------------------------|-----------------|-----------------|----------------------------------|-----------------|-----------------|
|            |               |               |                                 |                 |              |             |           |                                                        | Rotarod 2 mo                | Rotarod 4 mo    | Rotarod 6 mo    | Open field 2 mo                  | Open field 4 mo | Open field 6 mo |
| ASO00091   | 11/23/17      | 7/20/18       | y                               | 239             | <i>jimpy</i> | ASO P1p1.a  | mild      | Periorbital area inflammation, left eye                | 32.9                        | 22.4            | 5.6             | 22.0                             | 18.0            | 18.0            |
| ASO00095   | 11/23/17      | 7/20/18       | y                               | 239             | <i>jimpy</i> | ASO P1p1.a  | mild      | Periorbital area inflammation, bilateral               | 22.3                        | 24.6            | unable to train | 19.6                             | 13.7            | 14.0            |
| ASO00051   | 12/7/17       | 12/28/17      | n                               | 21              | <i>jimpy</i> | uninjected  | severe    |                                                        |                             |                 |                 |                                  |                 |                 |
| ASO00052   | 12/7/17       | 12/28/17      | n                               | 21              | <i>jimpy</i> | ASO control | severe    |                                                        |                             |                 |                 |                                  |                 |                 |
| ASO00053   | 12/7/17       | 12/29/17      | n                               | 22              | <i>jimpy</i> | ASO control | severe    |                                                        |                             |                 |                 |                                  |                 |                 |
| ASO00054   | 12/7/17       | 12/27/17      | n                               | 20              | <i>jimpy</i> | ASO control | severe    |                                                        |                             |                 |                 |                                  |                 |                 |
| ASO00055   | 12/8/17       | 12/24/17      | n                               | 16              | <i>jimpy</i> | uninjected  | severe    |                                                        |                             |                 |                 |                                  |                 |                 |
| ASO00056   | 12/8/17       | 12/27/17      | n                               | 19              | <i>jimpy</i> | uninjected  | severe    |                                                        |                             |                 |                 |                                  |                 |                 |
| ASO00057   | 12/11/17      | 12/26/17      | n                               | 15              | <i>jimpy</i> | uninjected  | severe    |                                                        |                             |                 |                 |                                  |                 |                 |
| ASO00058   | 12/5/17       | 12/25/17      | n                               | 20              | <i>jimpy</i> | uninjected  | severe    |                                                        |                             |                 |                 |                                  |                 |                 |
| ASO00059   | 12/5/17       | 12/25/17      | n                               | 20              | <i>jimpy</i> | uninjected  | severe    |                                                        |                             |                 |                 |                                  |                 |                 |
| ASO000S10  | 12/8/17       | 12/28/17      | n                               | 20              | <i>jimpy</i> | uninjected  | severe    | Found with hind-limb paralysis, required euthanization |                             |                 |                 |                                  |                 |                 |
| ASO000S11  | 12/8/17       | 12/30/17      | n                               | 22              | <i>jimpy</i> | uninjected  | severe    |                                                        |                             |                 |                 |                                  |                 |                 |
| ASO000S12  | 12/8/17       | 12/28/17      | n                               | 20              | <i>jimpy</i> | uninjected  | severe    | Found with hind-limb paralysis, required euthanization |                             |                 |                 |                                  |                 |                 |
| AS000103   | 12/27/17      | 8/27/18       | y                               | 243             | <i>jimpy</i> | ASO P1p1.b  | mild      | Periorbital area inflammation, right eye               | unable to train             | unable to train | unable to train | 13.2                             | 6.2             | 4.3             |
| AS000104   | 12/27/17      | 8/27/18       | y                               | 243             | <i>jimpy</i> | ASO P1p1.b  | mild      |                                                        | 39.4                        | 49.5            | 27.8            | 14.5                             | 9.0             | 11.3            |
| ASO000S13  | 12/27/17      | 1/18/18       | n                               | 22              | <i>jimpy</i> | uninjected  | severe    |                                                        |                             |                 |                 |                                  |                 |                 |
| AS000105b  | 12/28/17      | 8/27/18       | y                               | 242             | <i>jimpy</i> | ASO P1p1.b  | mild      |                                                        | 51.5                        | 37.2            | 36.9            | 13.8                             | 12.7            | 8.8             |
| AS000106   | 12/28/17      | 8/27/18       | y                               | 242             | <i>jimpy</i> | ASO P1p1.b  | mild      |                                                        | 34.7                        | 27.4            | 37.2            | 15.0                             | 15.5            | 8.9             |
| AS000107   | 12/30/17      | 8/27/18       | y                               | 240             | <i>jimpy</i> | ASO P1p1.a  | mild      |                                                        | unable to train             | unable to train | unable to train | 11.3                             | 15.7            | 12.8            |
| AS000108   | 12/30/17      | 8/27/18       | y                               | 240             | <i>jimpy</i> | ASO P1p1.a  | mild      | Periorbital area inflammation, bilateral               | unable to train             | 17.0            | unable to train | 10.1                             | 15.1            | 18.5            |
| AS000109   | 12/31/17      | 8/27/18       | y                               | 239             | <i>jimpy</i> | ASO P1p1.a  | mild      |                                                        | 14.3                        | 34.1            | 3.3             | 15.1                             | 14.2            | 10.7            |
| ASO000S14  | 12/18/17      | 1/5/18        | n                               | 18              | <i>jimpy</i> | uninjected  | severe    |                                                        |                             |                 |                 |                                  |                 |                 |
| ASO000S15  | 12/18/17      | 1/5/18        | n                               | 18              | <i>jimpy</i> | uninjected  | severe    |                                                        |                             |                 |                 |                                  |                 |                 |
| ASO000S16  | 12/18/17      | 1/4/18        | n                               | 17              | <i>jimpy</i> | uninjected  | severe    |                                                        |                             |                 |                 |                                  |                 |                 |
| ASO000S17  | 1/6/18        | 1/25/18       | n                               | 19              | <i>jimpy</i> | ASO control | severe    |                                                        |                             |                 |                 |                                  |                 |                 |
| ASO000S18  | 1/6/18        | 1/25/18       | n                               | 19              | <i>jimpy</i> | ASO control | severe    |                                                        |                             |                 |                 |                                  |                 |                 |
| ASO000S19  | 12/29/17      | 1/18/18       | n                               | 20              | <i>jimpy</i> | uninjected  | severe    |                                                        |                             |                 |                 |                                  |                 |                 |
| AS000115   | 1/22/18       | 9/7/18        | y                               | 228             | <i>jimpy</i> | ASO P1p1.b  | mild      |                                                        | 41.9                        | 19.2            | 8.1             | 11.9                             | 8.4             | 3.3             |
| ASO000S20  | 1/22/18       | 3/30/18       | n                               | 67              | <i>jimpy</i> | ASO P1p1.b  | mild      |                                                        | 31.1                        | dead            | dead            | 20.5                             | dead            | dead            |
| AS000117   | 1/22/18       | 9/7/18        | y                               | 228             | <i>jimpy</i> | ASO P1p1.b  | mild      |                                                        | 40.1                        | unable to train | unable to train | 14.8                             | 16.4            | 18.6            |
| AS000110   | 1/18/18       | 9/17/18       | y                               | 242             | <i>jimpy</i> | ASO P1p1.b  | mild      | Upper back inflammation                                | unable to train             | unable to train | unable to train | 23.9                             | 25.2            | 17.3            |
| ASO00096   | 12/7/17       | 7/23/18       | y                               | 228             | wild-type    | ASO control | none      |                                                        |                             |                 |                 |                                  |                 |                 |
| ASO00097   | 12/7/17       | 7/23/18       | y                               | 228             | wild-type    | ASO control | none      |                                                        |                             |                 |                 |                                  |                 |                 |
| ASO00099   | 12/7/17       | 7/23/18       | y                               | 228             | wild-type    | ASO control | none      |                                                        |                             |                 |                 |                                  |                 |                 |
| AS000100   | 12/5/17       | 7/23/18       | y                               | 230             | wild-type    | uninjected  | none      |                                                        | 111.1                       | 110.8           | 63.7            | 8.2                              | 1.4             | 3.9             |
| AS000101   | 12/5/17       | 7/23/18       | y                               | 230             | wild-type    | uninjected  | none      |                                                        | 76.8                        | 94.9            | 64.6            | 12.0                             | 3.3             | 2.9             |
| AS000102   | 12/5/17       | 7/23/18       | y                               | 230             | wild-type    | uninjected  | none      |                                                        | 53.1                        | 54.3            | 67.0            | 8.0                              | 7.9             | 3.8             |
| AS000111   | 1/19/18       | 9/17/18       | y                               | 241             | wild-type    | uninjected  | none      |                                                        | 84.0                        | 80.5            | 67.4            | 37.2                             | 32.9            | 21.7            |
| AS000112   | 1/19/18       | 9/17/18       | y                               | 241             | wild-type    | uninjected  | none      |                                                        | 107.0                       | 61.0            | 76.3            | 17.9                             | 7.5             | 6.2             |
| AS000122   | 4/5/18        | 12/14/18      | y                               | 253             | wild-type    | ASO control | none      |                                                        |                             |                 | 3.7             |                                  |                 | 14.3            |
| AS000123   | 4/5/18        | 12/14/18      | y                               | 253             | wild-type    | ASO control | none      |                                                        |                             |                 | 18.3            |                                  |                 | 1.8             |
| AS000124   | 4/5/18        | 12/14/18      | y                               | 253             | wild-type    | ASO control | none      |                                                        |                             |                 | 89.4            |                                  |                 | 20.5            |
| AS000125   | 4/5/18        | 12/14/18      | y                               | 253             | wild-type    | ASO control | none      |                                                        |                             |                 | 107.1           |                                  |                 | 13.2            |
| AS000126   | 4/13/18       | 12/13/18      | y                               | 244             | wild-type    | ASO control | none      |                                                        |                             |                 | 123.7           |                                  |                 | 13.0            |
| AS000127   | 4/13/18       | 12/13/18      | y                               | 244             | wild-type    | ASO control | none      |                                                        |                             |                 | 45.4            |                                  |                 | 20.4            |
| AS000128   | 4/14/18       | 12/14/18      | y                               | 244             | wild-type    | ASO control | none      |                                                        |                             |                 |                 |                                  |                 |                 |
| ASO000S21  | 5/4/18        | 12/14/18      | y                               | 224             | wild-type    | ASO control | none      |                                                        |                             |                 |                 |                                  |                 |                 |
| ASO000S22  | 5/4/18        | 12/14/18      | y                               | 224             | wild-type    | ASO control | none      |                                                        |                             |                 |                 |                                  |                 |                 |

### Supplementary Data 6.

Table of metadata for all mice in Kaplan-Meier survival plot in Fig. 3b. We noted 5 of 13 of ASO-injected *jimpy* mice in our survival cohort developed periorbital or upper back skin inflammation. The underlying cause of this is unknown as it was not observed in ASO-injected wild-type littermates. Also included are raw data values for rotarod and open field assays in Fig. 4a, b.

SUPPLEMENTARY DATA 7

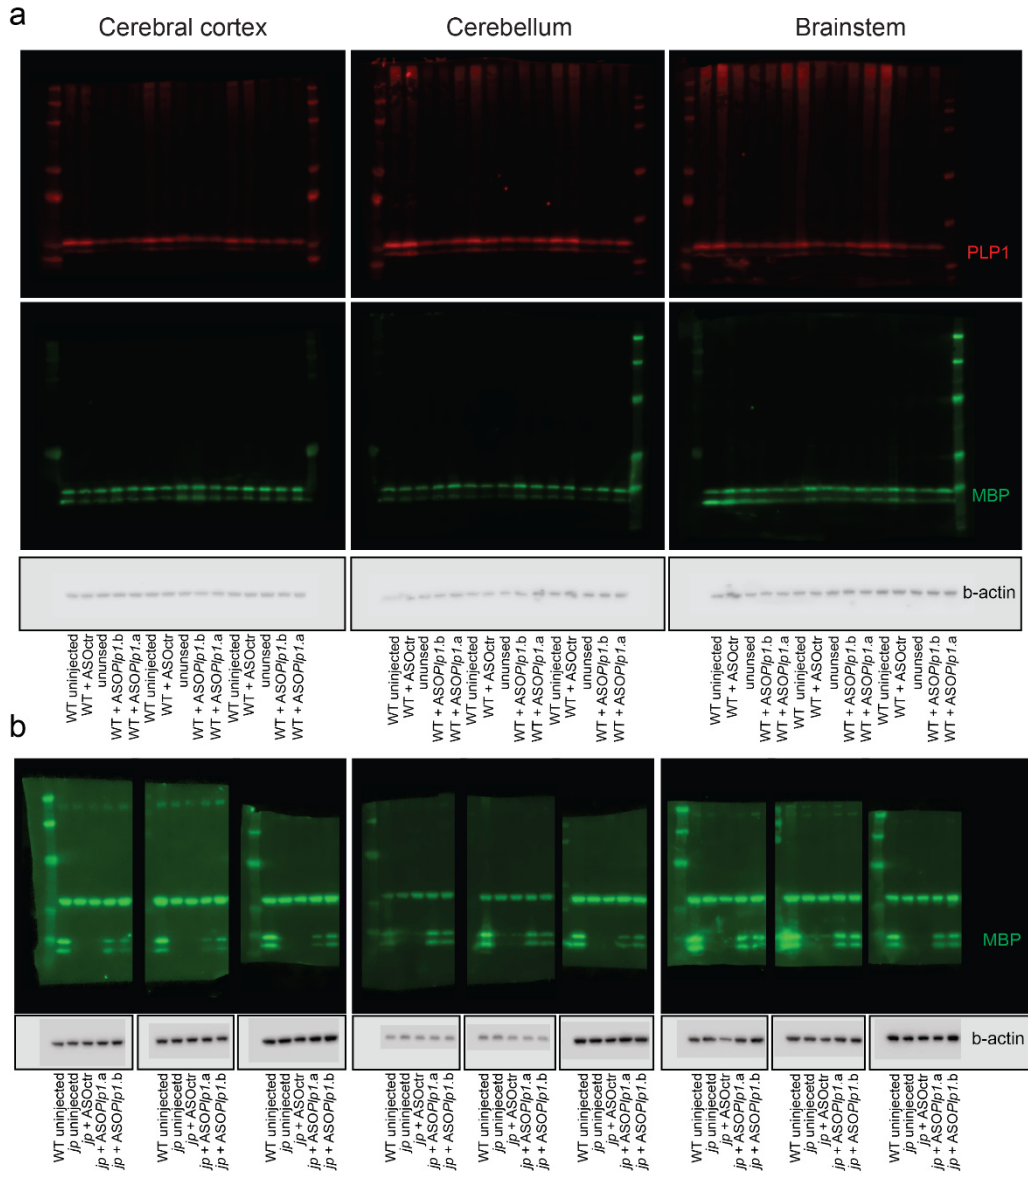

Supplementary Data 7.

**a-b,** Labeled raw images of western blots for all samples in Fig. 2g and Extended Data Fig. 7a, c. The upper bands in the fluorescent blots in **(b)** are carry over from chemiluminescent detection of B-actin (bottom panel).

## SUPPLEMENTARY DATA 8

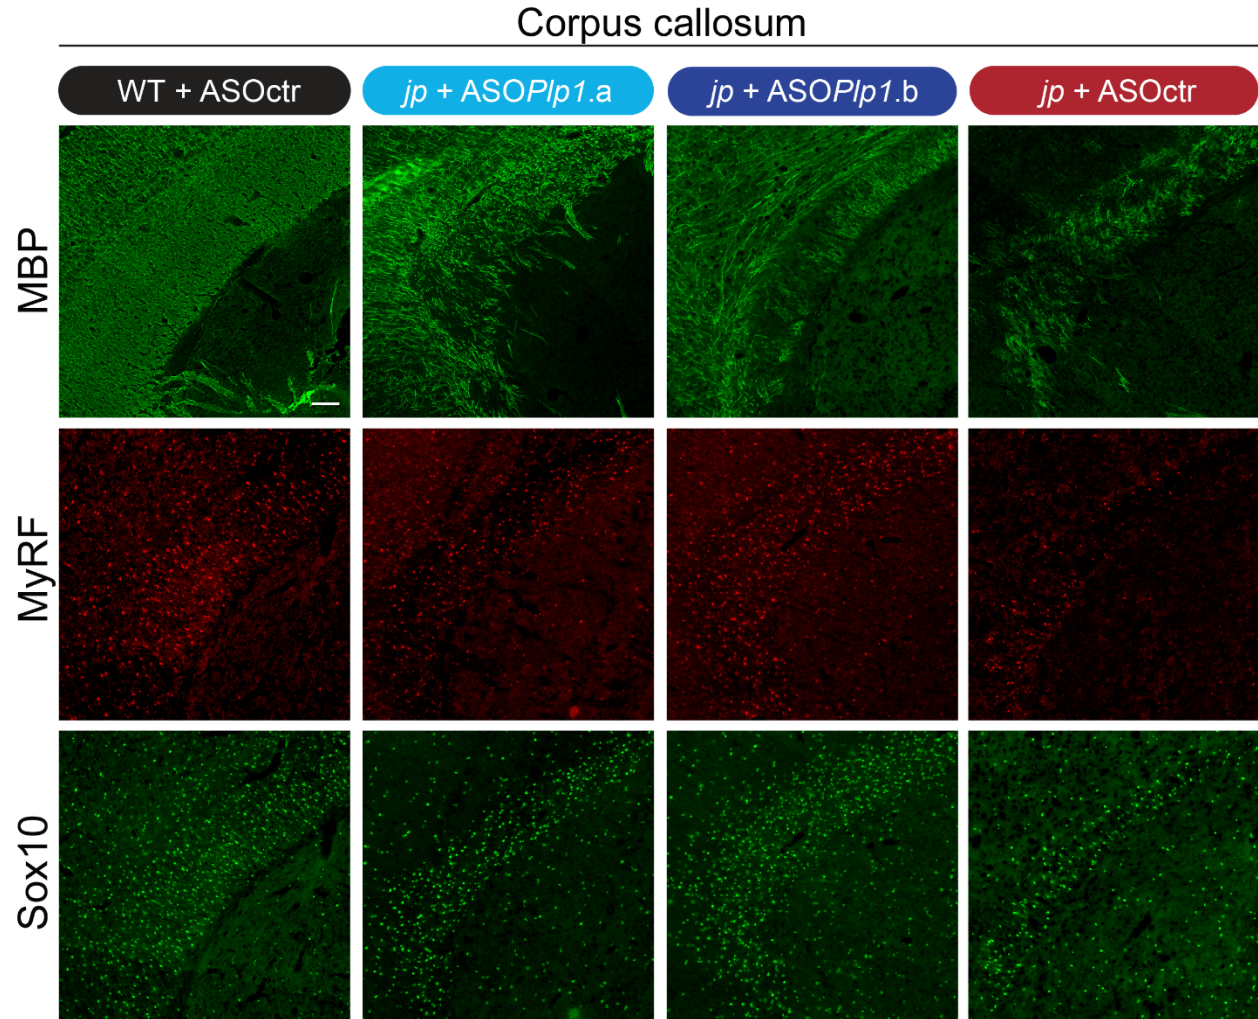

### Supplementary Data 8.

Representative source immunohistochemical images for counts in Fig. 3e,f of corpus callosum from mice, 3 weeks post-ASO injection (30ug dose at birth), showing MBP, MyRF, and Sox10. Replicate images generated for each biological replicate in Fig. 3e,f. Scale bar, 100µm.

## SUPPLEMENTARY DATA 9

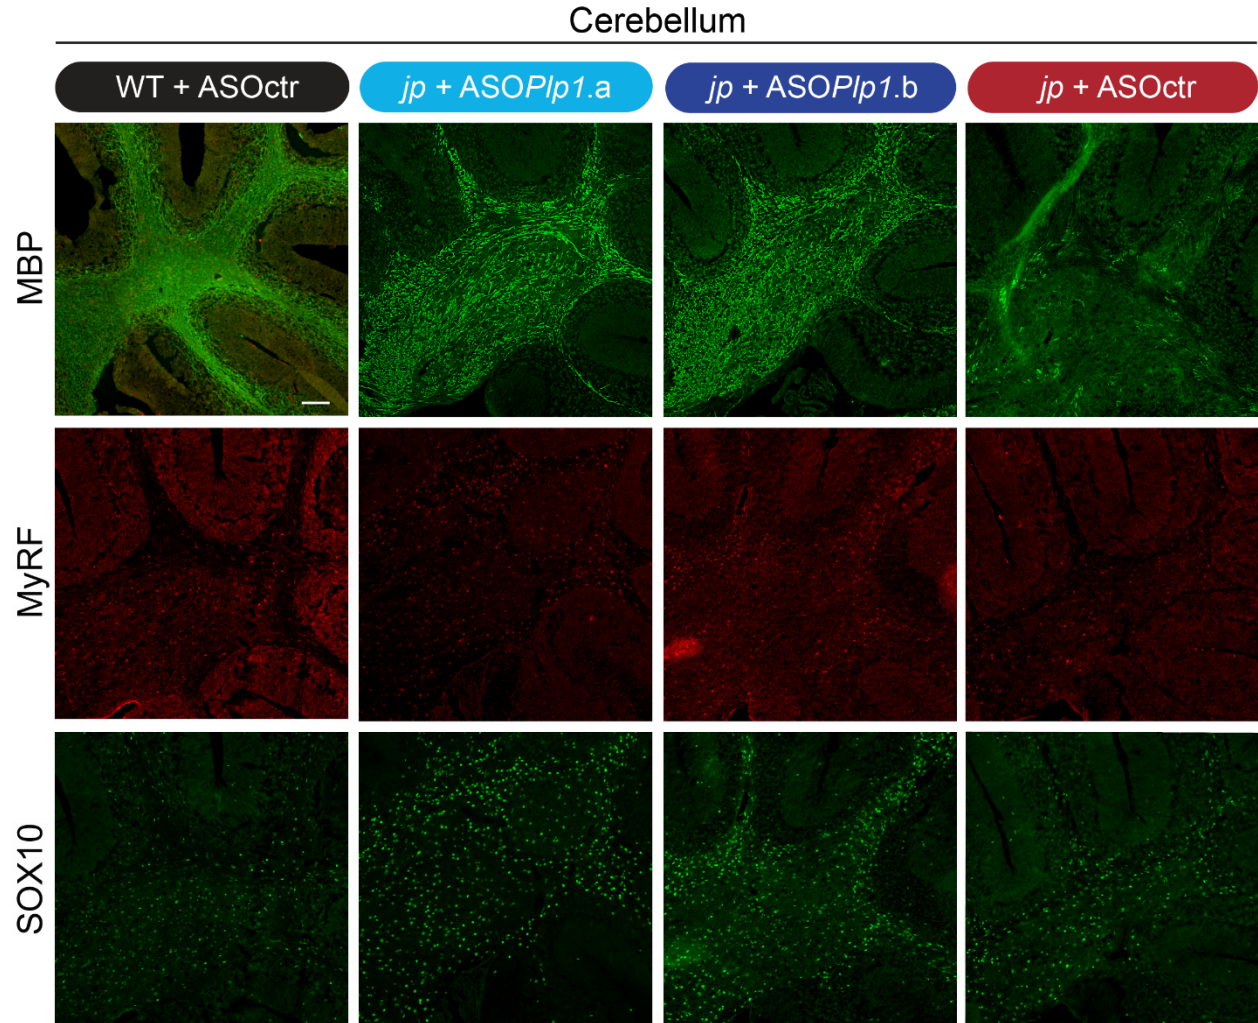

### Supplementary Data 9.

Representative source immunohistochemical images for counts in Fig. 3e,f of cerebellum from 3-week old mice injected at postnatal day 0 with the indicated ASOs showing MBP, MyRF, and Sox10. Replicate images generated for each biological replicate in Fig. 3e,f. Scale bar, 100 $\mu$ m.

## SUPPLEMENTARY DATA 10

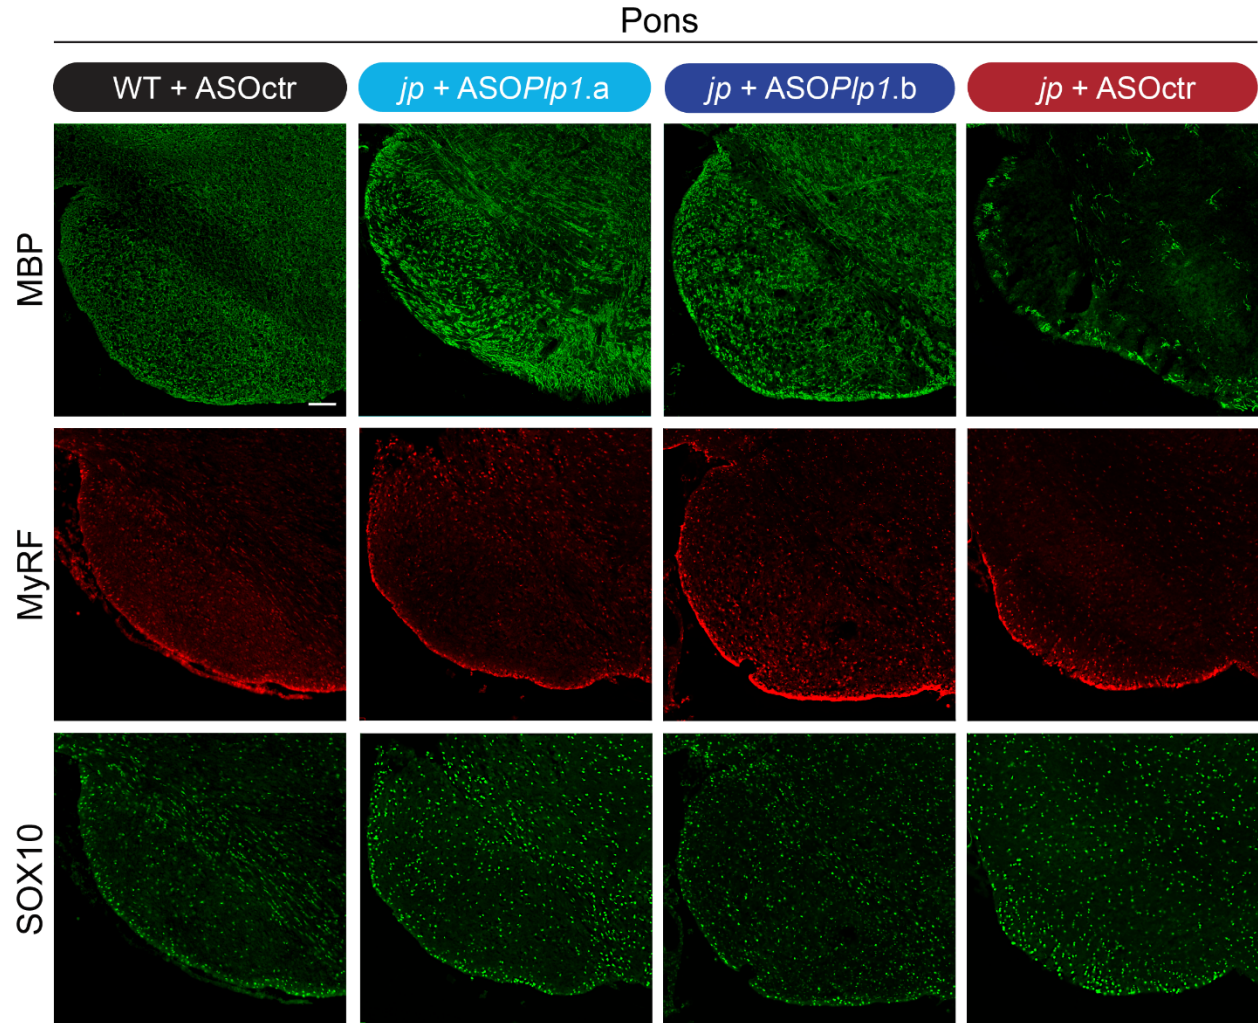

### Supplementary Data 10.

Representative source immunohistochemical images for counts in Fig. 3e,f of pons from mice, 3 weeks post-ASO injection (30ug dose at birth), showing MBP, MyRF, and Sox10. Replicate images generated for each biological replicate in Fig. 3e,f. Scale bar, 100 $\mu$ m.

## SUPPLEMENTARY DATA 11

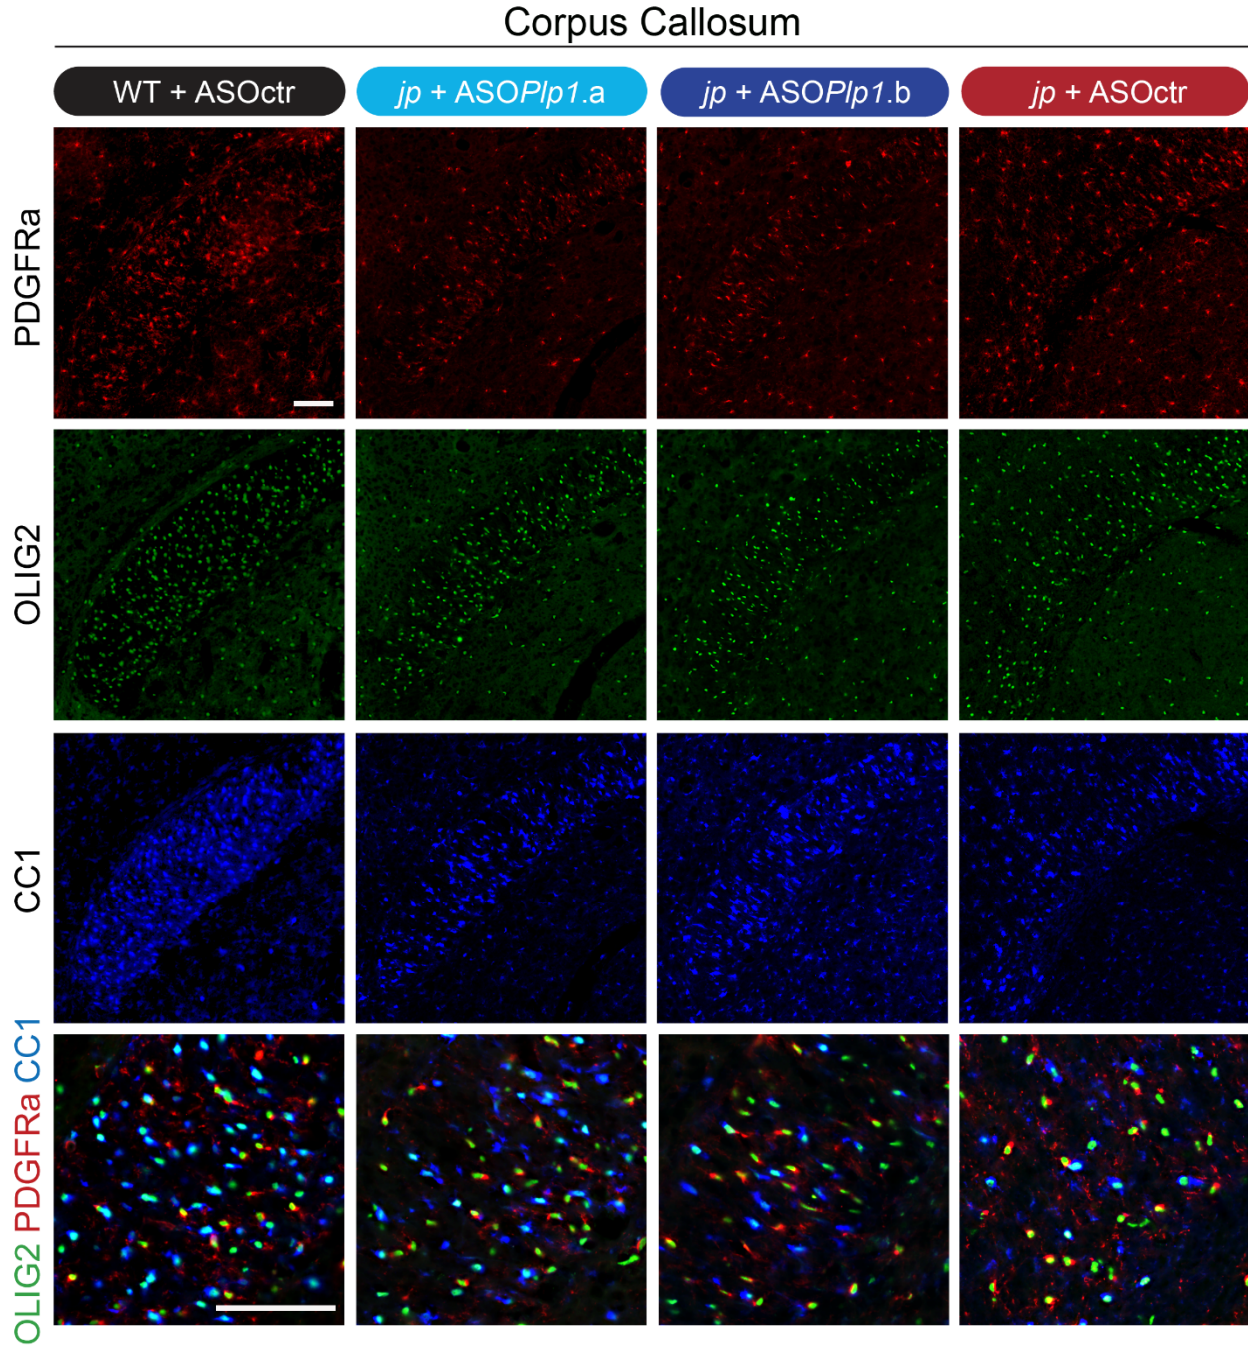

### Supplementary Data 11.

Representative source immunohistochemical images for counts in Extended Data Fig. 7f-h of corpus callosum from mice, 3 weeks post-ASO injection (30ug dose at birth), showing PDGFR $\alpha$ , Olig2, and CC1. Replicate images generated for each biological replicate in Extended Data Fig. 7f-h. Scale bar, 100 $\mu$ m.



## SUPPLEMENTARY DATA 12

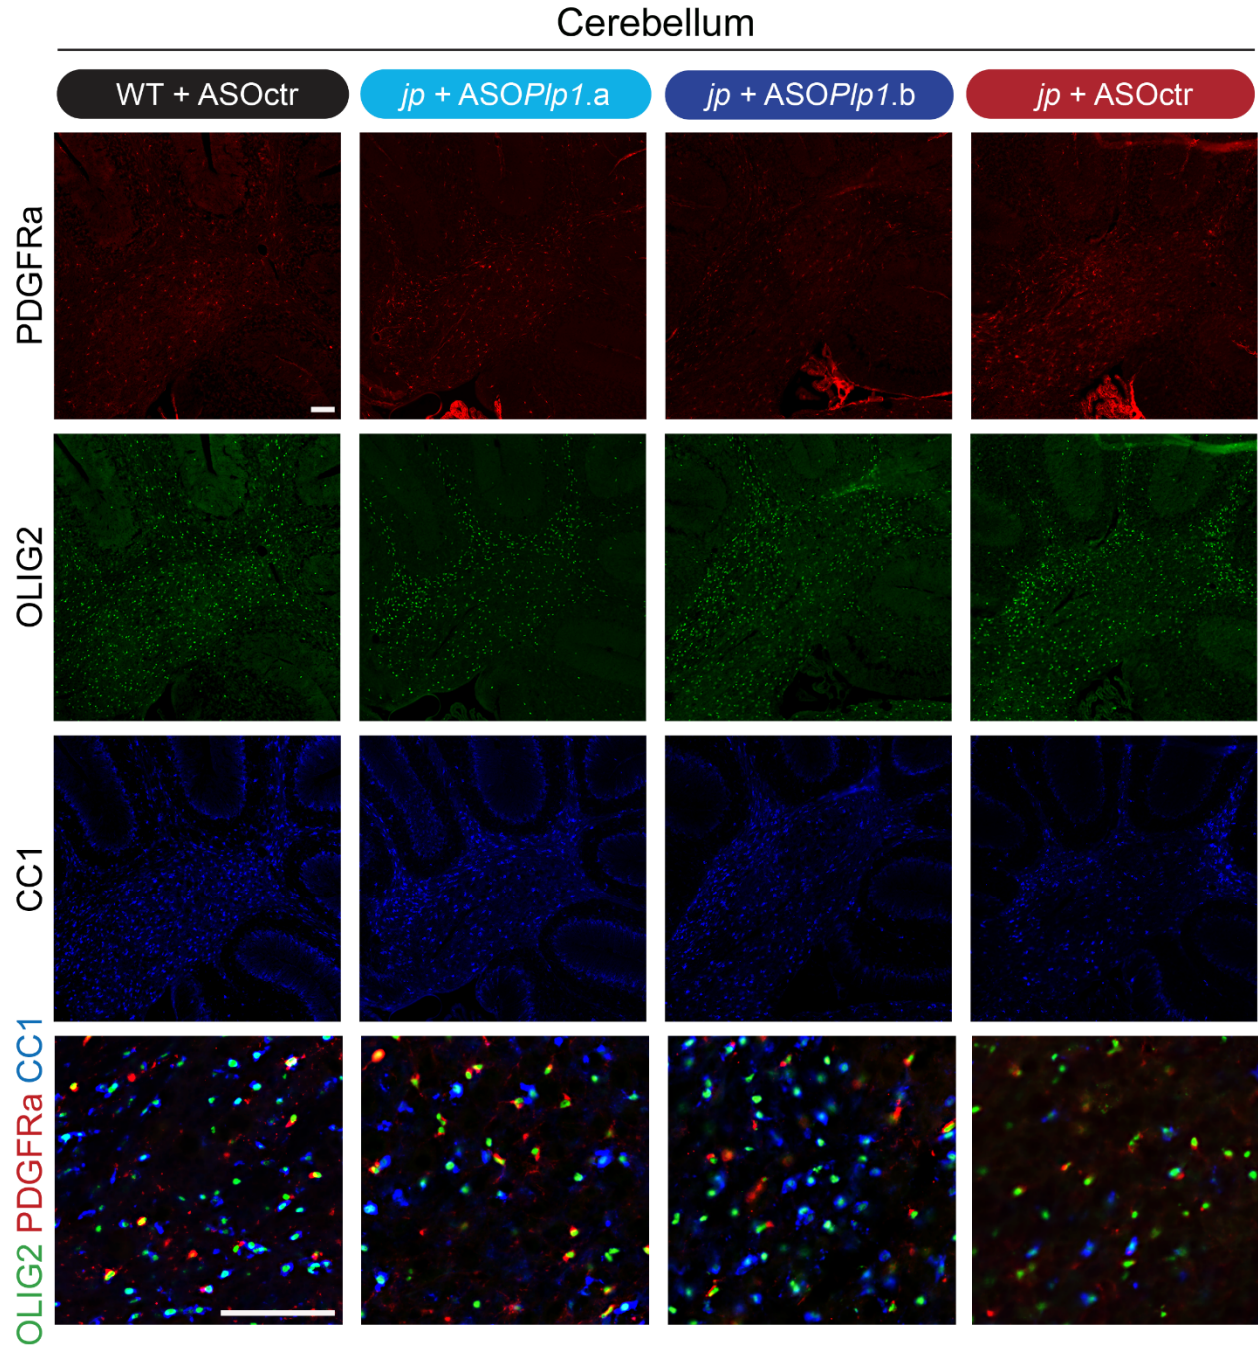

### Supplementary Data 12.

Representative source immunohistochemical images for counts in Extended Data Fig. 7f-h of cerebellum from mice, 3 weeks post-ASO injection (30 $\mu$ g dose at birth), showing PDGFR $\alpha$ , Olig2, and CC1. Replicate images generated for each biological replicate in Extended Data Fig. 7f-h. Scale bar, 100 $\mu$ m.

## SUPPLEMENTARY DATA 13

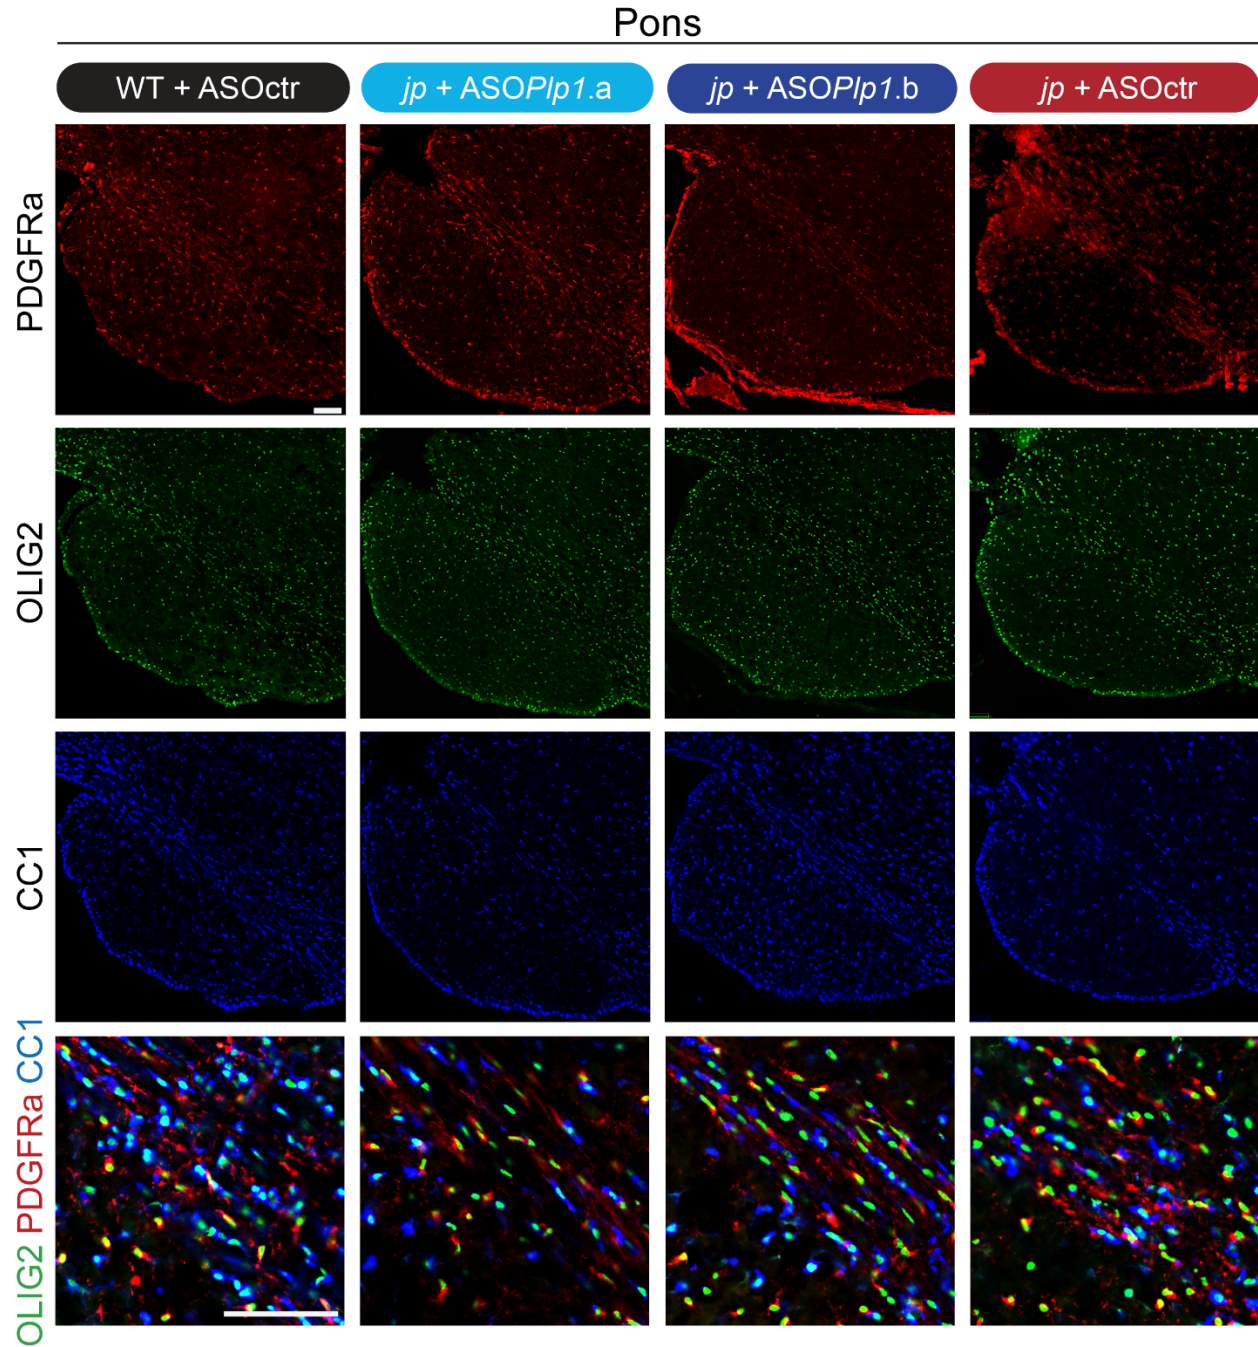

### Supplementary Data 13.

Representative source immunohistochemical images for counts in Extended Data Fig. 7f-h of pons collected from mice, 3 weeks post-ASO injection (30ug dose at birth), showing PDGFR $\alpha$ , Olig2, and CC1. Replicate images generated for each biological replicate in Extended Data Fig. 7f-h. Scale bar, 100 $\mu$ m.

## SUPPLEMENTARY DATA 14

Analyzed breath number in different conditions

|                               | Normal Air    | 5% CO <sub>2</sub> | 10.5% O <sub>2</sub> |
|-------------------------------|---------------|--------------------|----------------------|
| WT + ASOctr                   | 18,194 (n=10) | 7,556 (n=9)        | 2,471 (n=12)         |
| <i>jp</i> + ASOctr            | 8,980 (n=10)  | 4,787 (n=8)        | 1,836 (n=8)          |
| <i>jp</i> + ASOP <i>p</i> 1.b | 7,175 (n=8)   | 6,573 (n=8)        | 1,846 (n=9)          |

### Supplementary Data 14.

Cumulative analyzed breaths from mice, 3 weeks post-ASO injection (30ug dose at birth), after exposure to normal air, 5% CO<sub>2</sub>, and 10.5% O<sub>2</sub>. n corresponds to the number of individual mice analyzed in each cohort.

## Supplementary References

- 1 Garbern, J. Y. *et al.* Proteolipid protein is necessary in peripheral as well as central myelin. *Neuron* **19**, 205-218 (1997).
- 2 Garbern, J. Y. *et al.* Patients lacking the major CNS myelin protein, proteolipid protein 1, develop length-dependent axonal degeneration in the absence of demyelination and inflammation. *Brain* **125**, 551-561 (2002).
- 3 Lassuthova, P. *et al.* Three new PLP1 splicing mutations demonstrate pathogenic and phenotypic diversity of Pelizaeus-Merzbacher disease. *J Child Neurol* **29**, 924-931, doi:10.1177/0883073813492387 (2014).
- 4 Sistermans, E. A. *et al.* A (G-to-A) mutation in the initiation codon of the proteolipid protein gene causing a relatively mild form of Pelizaeus-Merzbacher disease in a Dutch family. *Hum Genet* **97**, 337-339 (1996).
- 5 Hand, C. K., Bernard, G., Dubé, M.-P., Shevell, M. I. & Rouleau, G. A. A Novel PLP1 Mutation Further Expands the Clinical Heterogeneity at the Locus. *The Canadian Journal of Neurological Sciences* **39**, 220-224, doi:10.1017/s0317167100013263 (2014).
