# Supplementary material for: Suppression of proteolipid protein rescues Pelizaeus–Merzbacher disease
Source: Springer Nature journal article supplement (doi:10.1038/s41586-020-2494-3), 2020-07-01
Supplement: 41586_2020_2494_MOESM2_ESM.pdf [file 41586_2020_2494_MOESM2_ESM.pdf]

## Reporting Summary

Nature Research wishes to improve the reproducibility of the work that we publish. This form provides structure for consistency and transparency in reporting. For further information on Nature Research policies, see [Authors & Referees](#) and the [Editorial Policy Checklist](#).

### Statistics

For all statistical analyses, confirm that the following items are present in the figure legend, table legend, main text, or Methods section.

n/a Confirmed

- |                                     |                                     |                                                                                                                                                                                                                                                            |
|-------------------------------------|-------------------------------------|------------------------------------------------------------------------------------------------------------------------------------------------------------------------------------------------------------------------------------------------------------|
| <input type="checkbox"/>            | <input checked="" type="checkbox"/> | The exact sample size ( $n$ ) for each experimental group/condition, given as a discrete number and unit of measurement                                                                                                                                    |
| <input type="checkbox"/>            | <input checked="" type="checkbox"/> | A statement on whether measurements were taken from distinct samples or whether the same sample was measured repeatedly                                                                                                                                    |
| <input type="checkbox"/>            | <input checked="" type="checkbox"/> | The statistical test(s) used AND whether they are one- or two-sided<br><i>Only common tests should be described solely by name; describe more complex techniques in the Methods section.</i>                                                               |
| <input checked="" type="checkbox"/> | <input type="checkbox"/>            | A description of all covariates tested                                                                                                                                                                                                                     |
| <input type="checkbox"/>            | <input checked="" type="checkbox"/> | A description of any assumptions or corrections, such as tests of normality and adjustment for multiple comparisons                                                                                                                                        |
| <input type="checkbox"/>            | <input checked="" type="checkbox"/> | A full description of the statistical parameters including central tendency (e.g. means) or other basic estimates (e.g. regression coefficient) AND variation (e.g. standard deviation) or associated estimates of uncertainty (e.g. confidence intervals) |
| <input type="checkbox"/>            | <input checked="" type="checkbox"/> | For null hypothesis testing, the test statistic (e.g. $F$ , $t$ , $r$ ) with confidence intervals, effect sizes, degrees of freedom and $P$ value noted<br><i>Give <math>P</math> values as exact values whenever suitable.</i>                            |
| <input checked="" type="checkbox"/> | <input type="checkbox"/>            | For Bayesian analysis, information on the choice of priors and Markov chain Monte Carlo settings                                                                                                                                                           |
| <input checked="" type="checkbox"/> | <input type="checkbox"/>            | For hierarchical and complex designs, identification of the appropriate level for tests and full reporting of outcomes                                                                                                                                     |
| <input checked="" type="checkbox"/> | <input type="checkbox"/>            | Estimates of effect sizes (e.g. Cohen's $d$ , Pearson's $r$ ), indicating how they were calculated                                                                                                                                                         |

*Our web collection on [statistics for biologists](#) contains articles on many of the points above.*

### Software and code

Policy information about [availability of computer code](#)

#### Data collection

Images were acquired with Leica Application Suite X, Hamamatsu NDP 2.0, or Perkin Elmer Operetta Harmony software. Videos were acquired using an Apple iPhone. Optic nerve conduction velocity was recorded using AxoScope software (Molecular Devices). Behavioral measurements were recorded using ANY-maze software version 5.0 (open field) and Rota Rod Rotomax 5 (rotarod). Breathing was recorded on the IOX2 software (Emka).

#### Data analysis

Graphpad Prism was used to generate graphs and perform statistics. Adobe Photoshop, NIH ImageJ, and Perkin Elmer Harmony and Columbus software were used for calculations and cell counting. spCas9 CRISPR sgRNA design tool at [crispr.mit.edu](#) was used to design sgRNAs. CRISPR-induced indels were analyzed using the OutKnocker tool at [outknocker.org](#), GATK RealignerTargetCreator, IndelRealigner (version 3.3-2-gec30cee), Blat (v. 36x2), CCTop, RGEN Cas-OFFinder, CRISPOR, and the Integrative Genomics Viewer. Bowtie aligner 58 was used to identify putative ASO off-target transcript sequences. Adobe Photoshop and Illustrator were used to assemble images. Blots were analyzed with the Odyssey Fc imaging system (Li-Cor). LC-MS/MS data was analyzed using Bioinformatics Solutions PeaksStudio software.

For manuscripts utilizing custom algorithms or software that are central to the research but not yet described in published literature, software must be made available to editors/reviewers. We strongly encourage code deposition in a community repository (e.g. GitHub). See the Nature Research [guidelines for submitting code & software](#) for further information.

### Data

Policy information about [availability of data](#)

All manuscripts must include a [data availability statement](#). This statement should provide the following information, where applicable:

- Accession codes, unique identifiers, or web links for publicly available datasets
- A list of figures that have associated raw data
- A description of any restrictions on data availability

All data generated or analyzed during this study are included in this article and its supplementary information files. Source data for animal survival cohorts in Figs. 1b, k-l, and 3b, 4a-b are provided in Supplementary Data 1 and 6. Raw annotated western blot images for Extended Data Fig. 2b, d and Extended Data Fig. 7a, c are

provided as Supplementary Data 2 and 7. Source data for all graphs are provided as separate Excel files. Animals and iPSC lines are available from P.J.T. upon request.

## Field-specific reporting

Please select the one below that is the best fit for your research. If you are not sure, read the appropriate sections before making your selection.

Life sciences  Behavioural & social sciences  Ecological, evolutionary & environmental sciences

For a reference copy of the document with all sections, see [nature.com/documents/nr-reporting-summary-flat.pdf](https://www.nature.com/documents/nr-reporting-summary-flat.pdf)

## Life sciences study design

All studies must disclose on these points even when the disclosure is negative.

|                 |                                                                                                                                                                                                                                                                                                                                  |
|-----------------|----------------------------------------------------------------------------------------------------------------------------------------------------------------------------------------------------------------------------------------------------------------------------------------------------------------------------------|
| Sample size     | No statistical test was used to predetermine sample size. Instead, sample sizes were rationalized by considering sufficient replication (weighing the level of biological variation) as well as censoring (due to tissue harvesting at pre-determined time-points and inadvertent losses).                                       |
| Data exclusions | All data points were included in analyses except for certain animals that were censored from survival analyses to use in pre-determined terminal assays. Metadata for all mice in this study including censoring of animals in the survival analyses are found in Supplementary Figs. 1 and 3.                                   |
| Replication     | The ASO therapeutic response was tested with two independent ASOs and all data were replicated.                                                                                                                                                                                                                                  |
| Randomization   | Sample allocation was not random. Instead, biological controls were employed in all experiments.                                                                                                                                                                                                                                 |
| Blinding        | Investigators were blinded to animal genotype at the time of ASO injection. Investigators were blinded to genotype and treatment for immunohistochemistry quantifications. For other experiments (i.e. animal behavior, electrophysiology, and respiratory analysis) blinding was not possible due to the overt jimpy phenotype. |

## Reporting for specific materials, systems and methods

We require information from authors about some types of materials, experimental systems and methods used in many studies. Here, indicate whether each material, system or method listed is relevant to your study. If you are not sure if a list item applies to your research, read the appropriate section before selecting a response.

### Materials & experimental systems

| n/a                                 | Included in the study                                           |
|-------------------------------------|-----------------------------------------------------------------|
| <input type="checkbox"/>            | <input checked="" type="checkbox"/> Antibodies                  |
| <input type="checkbox"/>            | <input checked="" type="checkbox"/> Eukaryotic cell lines       |
| <input checked="" type="checkbox"/> | <input type="checkbox"/> Palaeontology                          |
| <input type="checkbox"/>            | <input checked="" type="checkbox"/> Animals and other organisms |
| <input checked="" type="checkbox"/> | <input type="checkbox"/> Human research participants            |
| <input checked="" type="checkbox"/> | <input type="checkbox"/> Clinical data                          |

### Methods

| n/a                                 | Included in the study                           |
|-------------------------------------|-------------------------------------------------|
| <input checked="" type="checkbox"/> | <input type="checkbox"/> ChIP-seq               |
| <input checked="" type="checkbox"/> | <input type="checkbox"/> Flow cytometry         |
| <input checked="" type="checkbox"/> | <input type="checkbox"/> MRI-based neuroimaging |

## Antibodies

### Antibodies used

Primary antibodies used for IHC: mouse anti-MBP (2µg/mL; 808401, Biolegend; RRID:AB\_2564741), rabbit anti-MBP (1:1000; Abcam, ab40390; RRID:AB\_1141521), rabbit anti-MyRF polyclonal antibody (1:500; kindly provided by Dr. Michael Wegner), goat anti-SOX10 (0.4µg/mL; AF2864, R&D Systems; RRID:AB\_442208), rabbit anti-GFAP (1:1000; Z0334, Dako; RRID:AB\_10013382), goat anti-IBA1 (0.1mg/mL; ab5076, Abcam), rabbit anti-IBA1 (1:2000; 019-19741, WAKO; RRID:AB\_839504), rabbit anti-ASO (1:2500; Ionis Pharmaceuticals, Carlsbad, CA), rabbit anti-HDAC2 (1:250; Abcam, ab16032; RRID:AB\_2118543), mouse anti-APC/CC1 (2.5 µg/ml; ab16794, Abcam; RRID:AB\_443473), mouse anti-APC/CC1 (1:250; MABC200, Millipore; RRID:AB\_11203645), rat anti-NG2 (25 µg/mL; MAB6689, R&D Systems; RRID:AB\_10890940), goat anti-PDGFRα (1:500; AF1062, R&D systems; RRID:AB\_2236897), and rabbit anti-OLIG2 (1:250; 13999-1-AP, ProteinTech; RRID:AB\_2157541).

Primary antibodies used for western blot: mouse anti-MBP antibody (1µg/mL; 808401, Biolegend; RRID:AB\_2564741) and rat anti-PLP antibody (1:1000; clone AA3, Lerner Research Institute Hybridoma Core, Cleveland, OH).

Primary antibodies used for ICC: mouse anti-MBP (1:500; 808401, Biolegend; RRID:AB\_2564741), rat anti-PLP (1:5000; clone AA3, Lerner Research Institute Hybridoma Core, Cleveland, OH), goat anti-SOX10 (2µg/mL; AF2864, R&D Systems; RRID:AB\_442208), rabbit anti-OLIG2 (1:1000; 13999-1-AP, ProteinTech; RRID:AB\_2157541), rabbit anti-NANOG (0.4µg/mL; AB21624, Abcam; RRID:AB\_446437), mouse anti-OCT3/4 (0.4µg/mL; SC-5279, Santa Cruz; RRID:AB\_628051).

## Validation

Primary antibodies used in this study are well accepted in the field and purchased from reputable suppliers with provided quality control metrics.

## Eukaryotic cell lines

Policy information about [cell lines](#)

## Cell line source(s)

Mouse iPSC lines were generated in-house

## Authentication

Cells lines were genotyped, karyotyped, and stained for canonical markers of OPCs and iPSCs.

## Mycoplasma contamination

Laboratory cell lines are routinely tested for mycoplasma contamination with consistently negative results.

Commonly misidentified lines  
(See [ICLAC](#) register)

No commonly misidentified cell lines were used in this study.

## Animals and other organisms

Policy information about [studies involving animals](#); [ARRIVE guidelines](#) recommended for reporting animal research

## Laboratory animals

Male jimpy mice (B6CBACa-Aw-J/A-Plp1jp EdaTa/J; RRID:IMSR\_JAX:000287), CRISPR modified jimpy (CR-impy) mice (this paper) and wild-type controls. All mice were on a B6CBACa background.

## Wild animals

No wild animals were used in this study.

## Field-collected samples

No field-collected samples were used in this study.

## Ethics oversight

All procedures were in accordance with the National Institutes of Health Guidelines for the Care and Use of Laboratory Animals and were approved by the Case Western Reserve University Institutional Animal Care and Use Committee (IACUC).

Note that full information on the approval of the study protocol must also be provided in the manuscript.
